# Supplementary material for: Quantum chemical modeling of hydrogen binding in metal–organic frameworks: validation, insight, predictions and challenges
Source: Royal Society of Chemistry journal article supplement (doi:10.1039/d3cp05540j), 2024-01-01
Supplement: d3cp05540j2.pdf [file d3cp05540j2.pdf]

## Supporting Information For

### Quantum Chemical Modeling of Single and Multiple Hydrogen Binding in Metal-Organic Frameworks: Validation, Insight, Predictions and Challenges.

Romit Chakraborty, \*,†,‡ Justin J. Talbot,‡ Hengyuan Shen,‡ Yuto Yabuuchi,‡,† Kurtis M. Carsch,‡ Henry Jiang,‡ Hiroyasu Furukawa,†,‡ Jeffrey R. Long,‡,†,¶ and Martin Head-Gordon\*,§,‡

† Materials Sciences Division, Lawrence Berkeley National Laboratory, Berkeley California

‡ Department of Chemistry, University of California, Berkeley

¶ Department of Chemical and Biomedical Engineering, University of California, Berkeley

§ Chemical Sciences Division, Lawrence Berkeley National Laboratory, Berkeley California

E-mail: romit@berkeley.edu; mhg@cchem.berkeley.edu

## Table of Contents

| Topic                                                                     | Page       |
|---------------------------------------------------------------------------|------------|
| <b>Thermochemistry of H<sub>2</sub> binding to MOFs</b>                   | <b>1-4</b> |
| <b>Thermochemistry of H<sub>2</sub> binding to Sc(I) and Ti(I)-MFU-4l</b> | <b>5</b>   |
| <b>SI References</b>                                                      | <b>5</b>   |

## Thermochemistry of H<sub>2</sub> binding to MOFs

Thermochemistry computations were performed at B3LYP-D2/def2-SVP level of theory under the standard RRHO approximation with full relaxation of the cluster model on H<sub>2</sub> binding.

### MOF-5

Previous research has indicated the H<sub>2</sub> can freely rotate at the binding site to a good approximation. In previous work, free rotation of H<sub>2</sub> in the bound configuration was assumed for thermochemistry calculations.<sup>1</sup> Given the more computationally expensive nature of frequency calculations, the formate model for MOF-5 was used for frequency analysis. Figure S1 shows a summary of enthalpy and entropy change as a function of temperature for H<sub>2</sub> binding to the cup MOF-5.

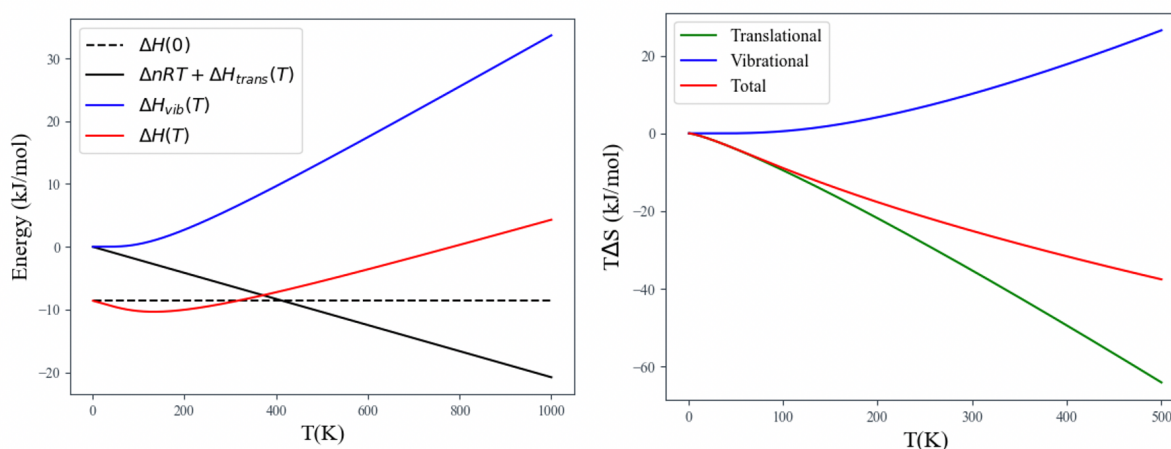

Figure S1: Summary of change in enthalpy and entropy as a function of temperature for H<sub>2</sub> binding at the cup site in MOF-5

### Ni<sub>2</sub>(m-dobdc)

Relaxing coordinates of the node resulted in artefactual distortion of the overall hexagonal symmetry of the material. Hence the cluster model was optimized with the nuclear coordinates derived from experimental crystal structure of the bare MOF

fixed. Fixing part of the cluster for geometry optimizations resulted in difficulty obtaining converged geometries with  $\omega$ B97M-V, and hence we optimized the geometry at B3LYP-D2/def2-SVP level of theory. The traditional harmonic approximation could not be applied for partially frozen cluster coordinates. Hence we modeled the thermochemistry under a

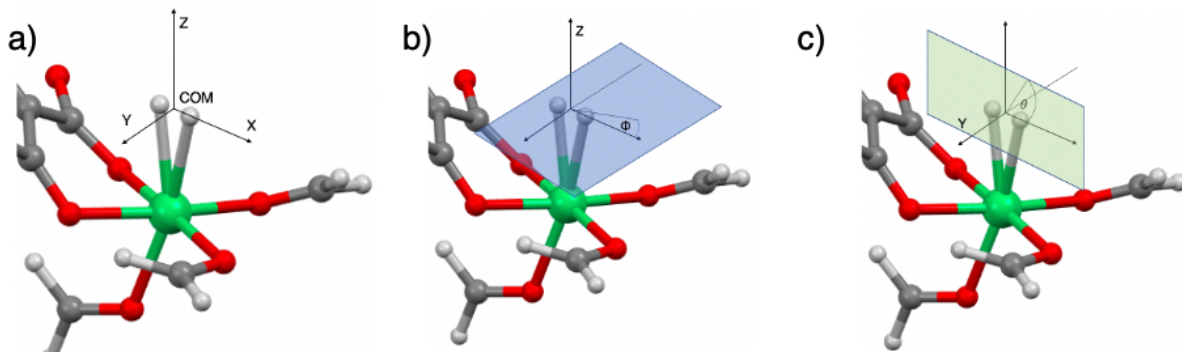

Fig. S1: Frustrated translational and rotational modes of bound H<sub>2</sub> in Ni<sub>2</sub>-m-dobdc. X, Y and Z axis for frustrated translations of H<sub>2</sub> center of mass (COM) a). Frustrated rotation along the Z axis with rotation angle  $\varphi$  (b), and along the Y axis with rotation angle  $\theta$  (c).

harmonic approximation for frustrated translational and rotational modes for H<sub>2</sub> bound to the Ni(II) site in Ni<sub>2</sub>-m-dobdc.

Frustrated translational and rotational modes of hydrogen in H<sub>2</sub> center of mass (COM) reference frame are shown in Figure 1. Finite difference scans from the equilibrium geometry were performed for the hindered modes of H<sub>2</sub> bound on the MOF OMS. A Fourier Grid Hamiltonian<sup>2</sup> was constructed and solved for each mode to obtain anharmonic vibrational frequencies. The corresponding harmonic ZPVEs were obtained from the curvature of the interpolated potential at equilibrium. 1D anharmonic corrections were applied to zero-point vibrational energies as  $\Delta 1D_{anharmonic}^{rigid} = \sum (\epsilon_{anharmonic}^{rigid} - \epsilon_{harmonic}^{rigid})$ . Akin to the case of MOF-5, we assumed free rotation of H<sub>2</sub> in its bound state.

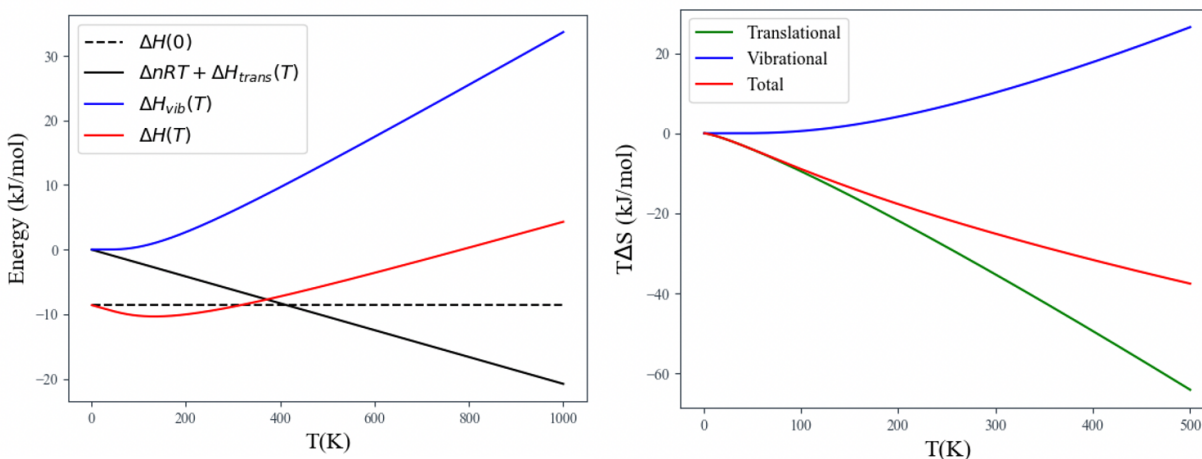

Figure S2: Summary of contributions to enthalpy and entropy changes for H<sub>2</sub> binding to Ni(II) in Ni<sub>2</sub>(m-dobdc)

## Cu(I)MFU-4l

All coordinates of the MOF node were relaxed for frequency calculations. A smaller model of the MOF node truncated at triazolate extremities was utilized for predicting thermochemical observables. The triazolate model for the MOF node has been utilized for frequency calculations for H<sub>2</sub> binding to Cu(I)MFU-4l in the past giving decent agreement with experimental values in instances where the optimized geometries of the loaded node are consistent with experimental observations.<sup>3</sup>

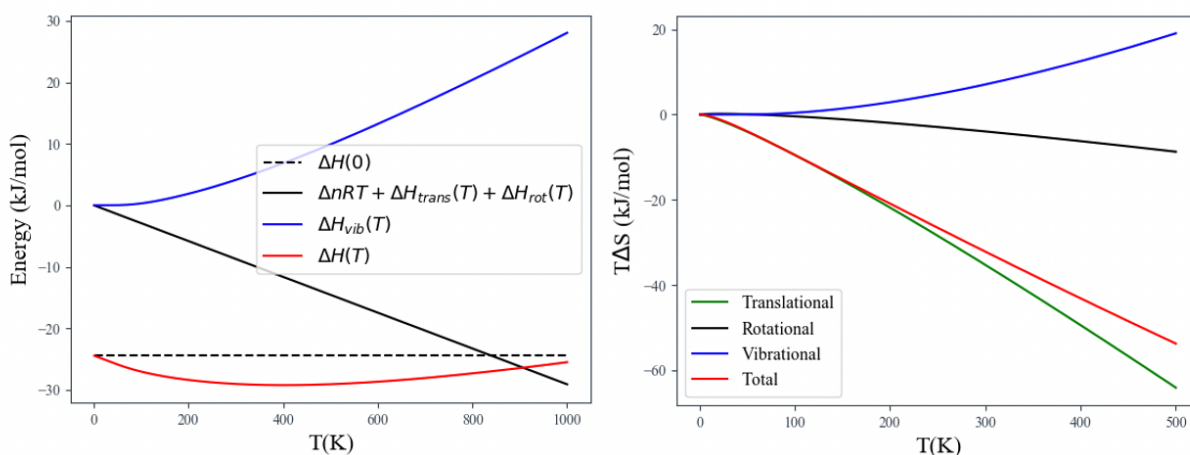

Figure 3: Summary of contributions to enthalpy and entropy changes for H<sub>2</sub> binding to Cu(I) in Cu(I)MFU-4l

## V<sub>2</sub>Cl<sub>x</sub>btdd

All coordinates of the cluster model representing the MOF node were relaxed for thermochemistry calculations. This was done in a similar approach as the one utilized in the original literature.<sup>4</sup>

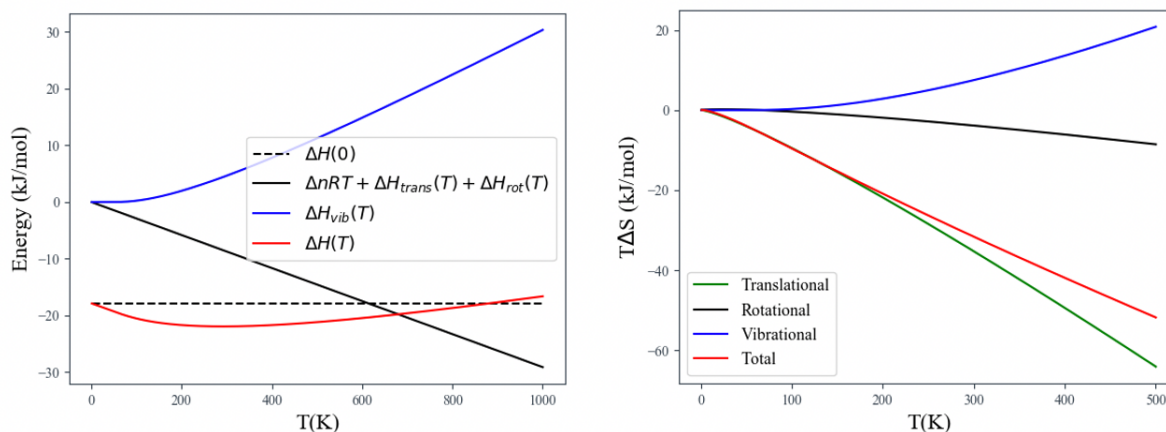

Figure 4: Summary of contributions to enthalpy and entropy change on H<sub>2</sub> binding to V(II) in V<sub>2</sub>Cl<sub>6</sub>btdd

### Thermochemistry for the ligation of three equivalents of H<sub>2</sub> at Sc(III)- and Ti(III)-MFU-4L

Table S2: Thermochemistry of H<sub>2</sub> binding to monovalent metal sites Sc(III) and Ti(III) in MFU-4L at 298 K and 1 atm. Sequential ligation of 1, 2, and 3 equivalents of H<sub>2</sub> at these metal sites occur with similar binding enthalpies of adsorption for three hydrogens.

|               | Sc(III) |       |       | Ti(III) |       |       |
|---------------|---------|-------|-------|---------|-------|-------|
| Term (kJ/mol) | 1       | 2     | 3     | 1       | 2     | 3     |
| ΔE            | -31.6   | -33.1 | -34.9 | -52.0   | -47.6 | -42.9 |
| ΔZPVE         | 11.5    | 11.2  | 12.9  | 12.1    | 12.4  | 14.1  |
| ΔH(0)         | -20.1   | -21.9 | -21.9 | -39.9   | -35.2 | -28.9 |
| ΔH(T)         | -24.7   | -27.9 | -26.9 | -45.2   | -40.2 | -34.0 |
| TΔS(T)        | -31.4   | -35.2 | -33.0 | -33.5   | -32.9 | -33.6 |
| ΔG(T)         | 6.7     | 7.3   | 6.1   | -11.7   | -7.3  | -0.5  |

### References

- (1) Sillar, K.; Hofmann, A.; Sauer, J. Ab Initio Study of Hydrogen Adsorption in MOF-5. *J. Am. Chem. Soc.* **2009**, *131* (11), 4143–4150.
- (2) Clay Marston, C.; Balint-Kurti, G. G. The Fourier Grid Hamiltonian Method for Bound State Eigenvalues and Eigenfunctions. *J. Chem. Phys.* **1989**, *91* (6), 3571–3576.
- (3) Barnett, B. R.; Evans, H. A.; Su, G. M.; Jiang, H. Z. H.; Chakraborty, R.; Banyeretse, D.; Hartman, T. J.; Martinez, M. B.; Trump, B. A.; Tarver, J. D.; Dods, M. N.; Funke, L. M.; Börgel, J.; Reimer, J. A.; Drisdell, W. S.; Hurst, K. E.; Gennett, T.; FitzGerald, S. A.; Brown, C. M.; Head-Gordon, M.; Long, J. R.

- Observation of an Intermediate to H<sub>2</sub> Binding in a Metal-Organic Framework. *J. Am. Chem. Soc.* **2021**, *143* (36), 14884–14894.
- (4) Jaramillo, D. E.; Jiang, H. Z. H.; Evans, H. A.; Chakraborty, R.; Furukawa, H.; Brown, C. M.; Head-Gordon, M.; Long, J. R. Ambient-Temperature Hydrogen Storage via Vanadium(II)-Dihydrogen Complexation in a Metal-Organic Framework. *J. Am. Chem. Soc.* **2021**, *143* (16), 6248–6256..
